# Supplementary material for: Circular extinction of plasmonic silver nanocaps and gas sensing
Source: Royal Society of Chemistry journal article supplement (doi:10.1039/c5fd00138b), 2015-11-06
Supplement: c5fd00138b1.pdf [file c5fd00138b1.pdf]

## Supporting Information

### Chiroptical Activity of Plasmonic Silver Nanocaps

Jun Li,<sup>†,‡</sup> Nicholas. A. Kotov<sup>†,\*</sup>

<sup>†</sup>Departments of Chemical Engineering, University of Michigan, Ann Arbor,  
Michigan 48109, USA;

<sup>‡</sup> School of Chemical Engineering and Technology, State Key Laboratory of Urban  
Water Resource and Environment, Harbin Institute of Technology, Harbin 150001,  
P.R. China.

Corresponding Author: Prof. Nicholas. A. Kotov

\*E-mail: kotov@umich.edu.

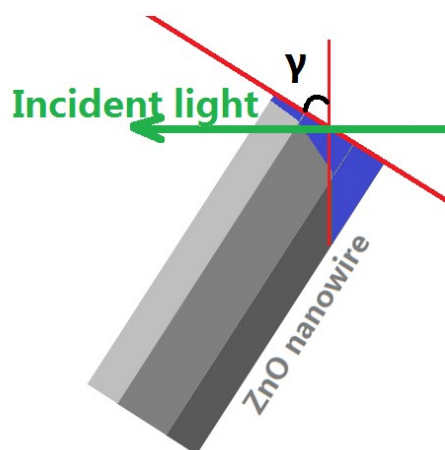

**Figure S1** Configuration of tilting angle ( $\gamma$ ) of Ag CPNs related to the incident circularly polarized light.

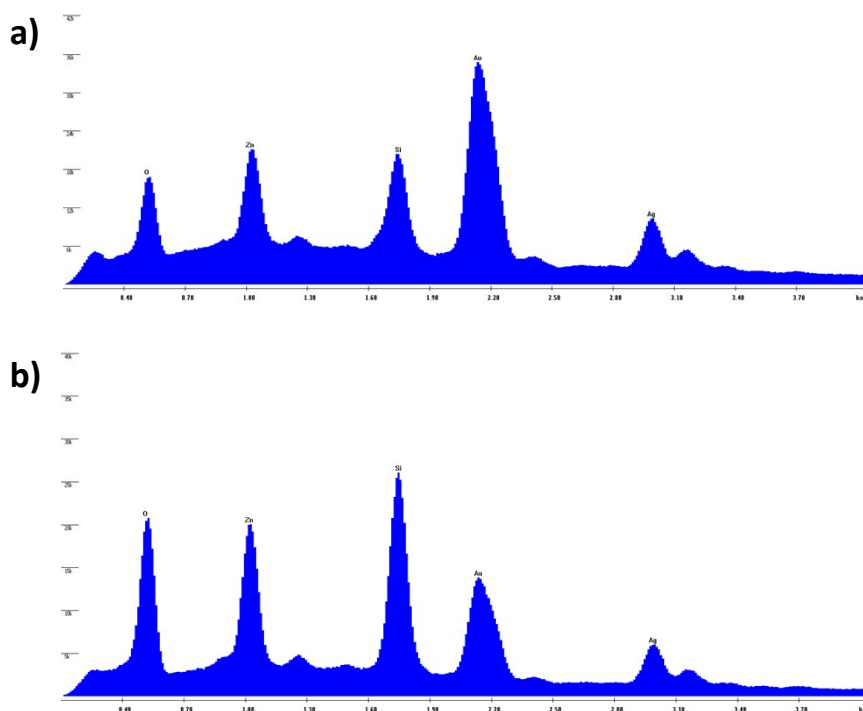

**Figure S2** EDS spectrum of a) ZnO NWs coated with chiral Ag and b) ZnO NWs coated with chiral Ag, after oxidization of 96 h in air.

**Table S1** Element analysis of the samples

|                                        | <b>O</b> | <b>Zn/O</b> | <b>Ag/O</b> |
|----------------------------------------|----------|-------------|-------------|
| <b>ZnO /chiral Ag</b>                  | 1.00     | 1.24        | 0.61        |
| <b>ZnO/chiral Ag after oxidization</b> | 1.00     | 0.97        | 0.29        |
